# Supplementary material for: Gasdermin C Is Upregulated by Inactivation of Transforming Growth Factor β Receptor Type II in the Presence of Mutated Apc, Promoting Colorectal Cancer Proliferation
Source: PLoS One. 2016 Nov 11;11(11):e0166422. doi: 10.1371/journal.pone.0166422 (PMC5105946; doi:10.1371/journal.pone.0166422)
Supplement: S1 Table — (XLSX) [file pone.0166422.s002.xlsx]

## Sheet: Sheet1
S1 Table. Information of primers related with quantitative RT-PCR and sequencing analysis.
Organism	Gene symbol	Gene name	Accession No.	Primer Sequence [5'→3']		Amplicon length
For quantitative RT-PCR
mus musculus	Gsdmc2	gasdermin C2	NM_001168274	F	TGGCACTTCGGTTGTTACC	111
			XM_003945970	R	ATGCTATCTTCCAGCCTCCTC
	Gsdmc4	gasdermin C4	NM_028992	F	TCTGTTGGTGCTGAGTGATACC	136
			XM_001474104	R	TGTGAAGGGAGTGTTTGAGG
	B2m	beta-2-microglobulin	NM_009735	F	TGGTCTTTCTGGTGCTTGTC	108
				R	GTATGTTCGGCTTCCCATTC
Homo sapiens	GSDMC	gasdermin C	NM_031415	F	TGGAAGCAAAGACCTGACAC	103
				R	CCAAAATGATGAACGAGAATCC
	B2M	beta-2-microglobulin	NM_004048	F	TGCCGTGTGAACCATGTG	92
				R	GCGGCATCTTCAAACCTC
For sequencing analysis
Homo sapiens	TGFBR2	transforming growth factor, beta receptor II	NM_001024847	F	CCTCGCTTCCAATGAATCTC
				R	AATCCACCACAGGAGGAATG	322
Abbreviations: F, Forward; R, Reverse
